# Supplementary material for: Phytotoxicity of Rich Oxygenated Terpenes Essential Oil of Prosopis farcta against the Weed Dactyloctenium aegyptium
Source: MDPI journal article supplement (doi:10.3390/separations10060361), 2023-06-18
Supplement: s1 [file s1]

# Phytotoxicity of Rich-Oxygenated Terpenes Essential Oil of *Prosopis farcta* against the Weed *Dactyloctenium aegyptium*

Ahmed M. Abd-ElGawad <sup>1,\*</sup>, Abdulaziz M. Assaeed <sup>1</sup>, Abd El-Nasser El Gendy <sup>2</sup>, Luisa Pistelli <sup>3</sup>, Basharat A. Dar <sup>1</sup> and Abdelsamed I. Elshamy <sup>4</sup>

<sup>1</sup> Plant Production Department, College of Food and Agriculture Sciences, King Saud University, P.O. Box 2460, Riyadh 11451, Saudi Arabia; aibrahim2@ksu.edu.sa (A.M.A.-E.), assaeed@ksu.edu.sa (A.M.A.), basera-tali@gmail.com (B.A.D.)

<sup>2</sup> Medicinal and Aromatic Plants Research Department, National Research Centre, 33 El Bohouth St., Dokki, Giza 12622, Egypt; aggundy\_5@yahoo.com

<sup>3</sup> Dipartimento di Farmacia, Università di Pisa, Via Bonanno Pisano 6, 56126 Pisa, Italy; luisa.pistelli@unipi.it

<sup>4</sup> Department of Natural Compounds Chemistry, National Research Centre, 33 El Bohouth St., Dokki, Giza, 12622, Egypt; elshamynrc@yahoo.com

\* Correspondence: aibrahim2@ksu.edu.sa; Tel.: (+966562640864)

## Supplementary Materials

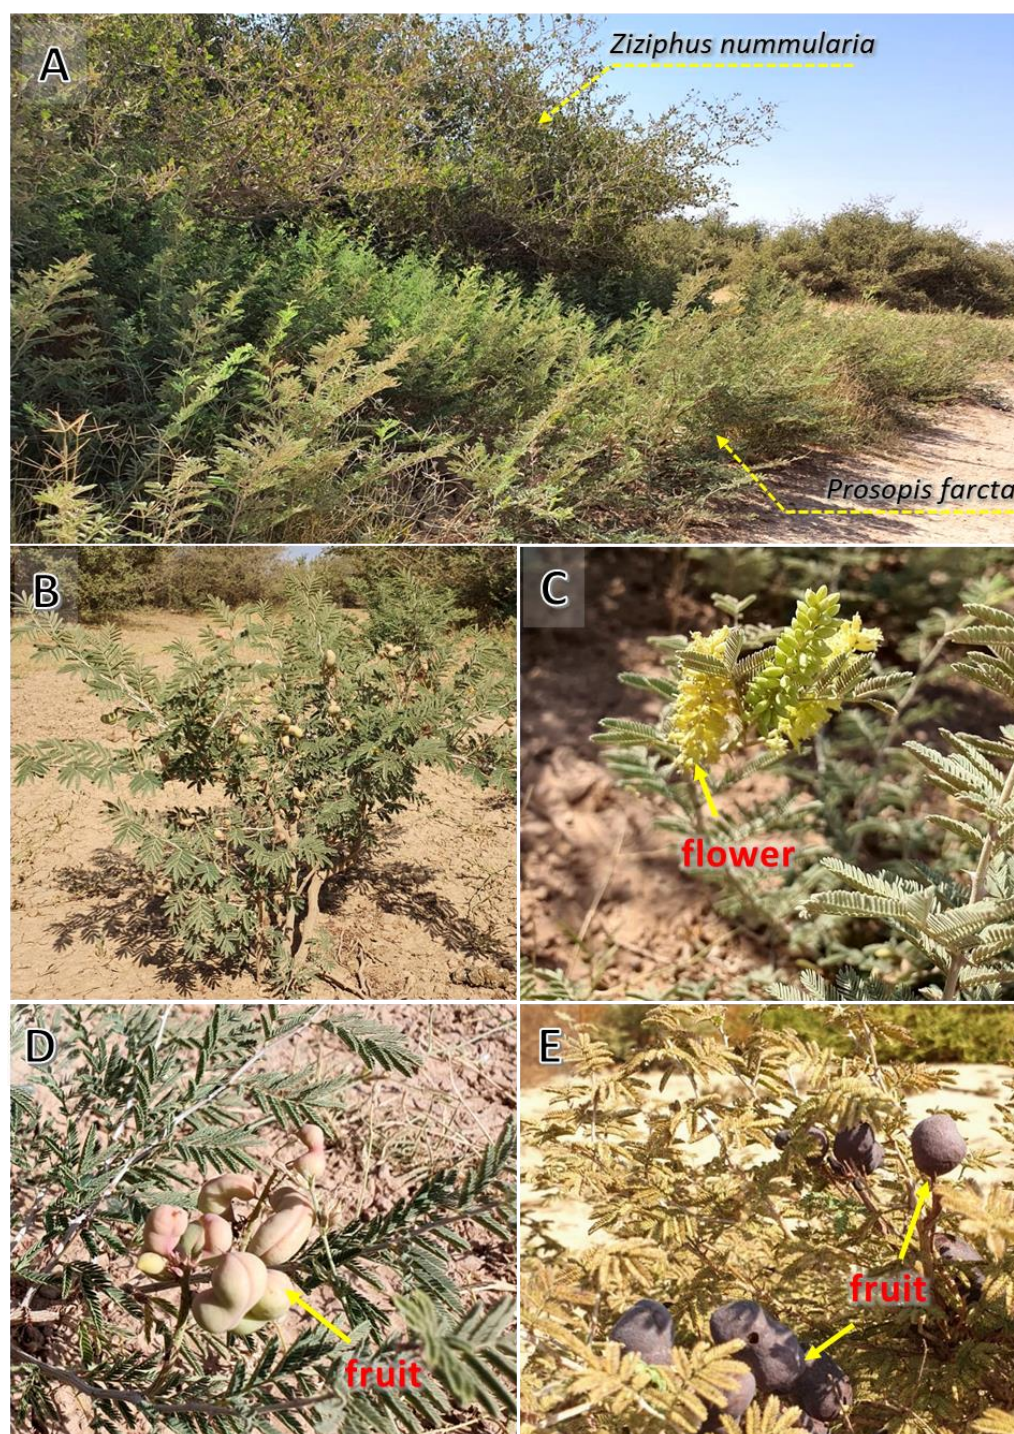

**Figure S1.** *Prosopis farcta* (Banks & Sol.) J.F. Macbr. A) population of *P. farcta* under the canopy periphery of the tree *Ziziphus nummularia* (Burm.f.) Wight & Arn., B) vegetative plant of *P. farcta*, C), flowering branch D), fruiting branch, and E) black ripened legumes.

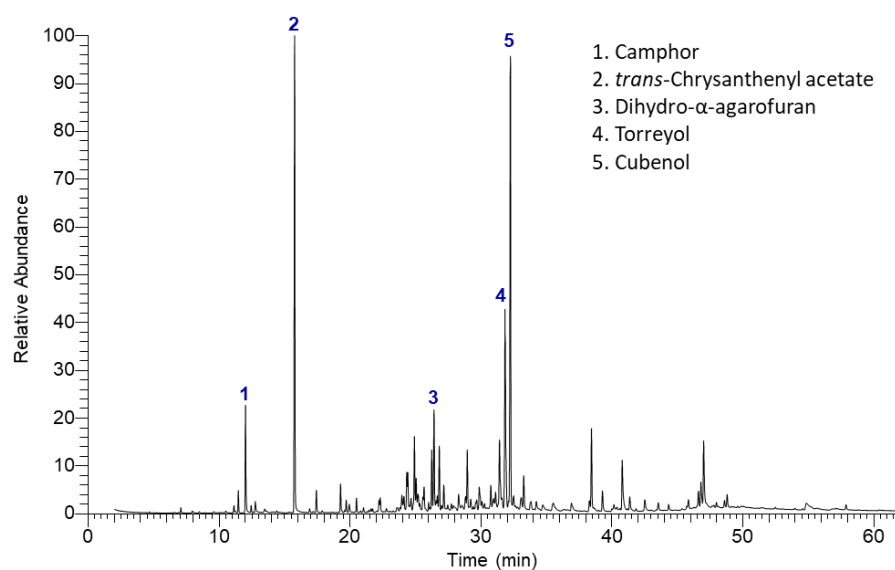

**Figure S2.** GC-MS ion chromatogram of the essential oil of *Prosopis farcta* above-ground parts. The peaks of the main compounds were numbers (1-5) and explained on the right side.

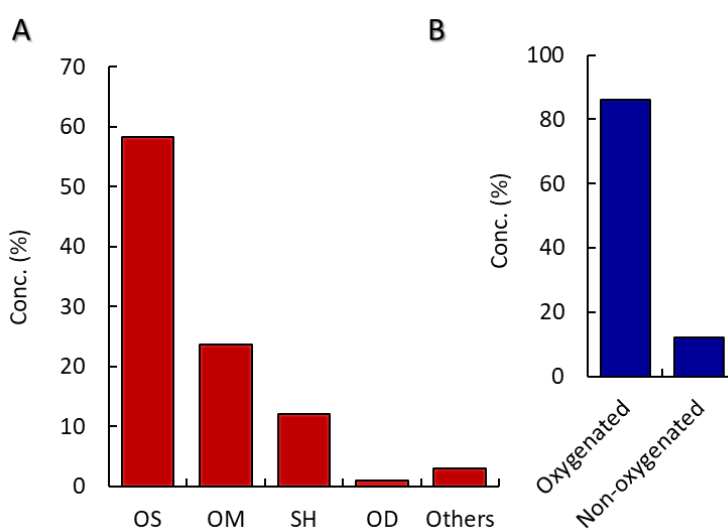

**Figure S3.** Chemical compounds grouping. A) The classes of the identified chemical constituents of *Prosopis farcta*, and B) the percentage of oxygenated and non-oxygenated compounds. OS: oxygenated sesquiterpenes, OM: oxygenated monoterpenes, SH: sesquiterpene hydrocarbons, and OD: oxygenated diterpenes.

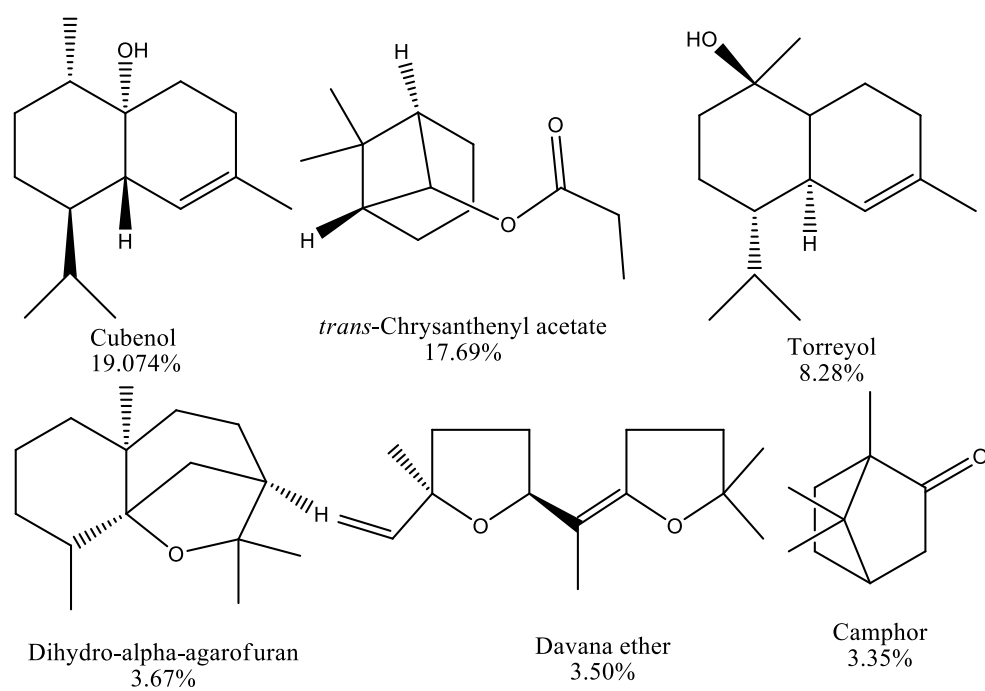

**Figure S4.** Structures of the major components (> 3%) of the essential oil of *Prosopis farcta*.
